# Supplementary material
Source: PubMed Central journal article supplement (PMC5016118)
Supplement: 10.1074_M116.732966_jbc.M116.732966-1.pdf [file 10.1074_M116.732966_jbc.M116.732966-1.pdf]

## SUPPLEMENTAL DATA

### Mechanism of 17 $\alpha$ ,20-Lyase and New Hydroxylation Reactions of Human Cytochrome P450 17A1

#### <sup>18</sup>O-LABELING AND OXYGEN SURROGATE EVIDENCE FOR A ROLE OF A PERFERRYL OXYGEN

Francis K. Yoshimoto, Eric Gonzalez, Richard J. Auchus, and F. Peter Guengerich  
*J. Biol. Chem.* **291**, xxx-xx (2016)

#### CONTENTS

FIGURE S1. NOESY NMR spectrum of 6 $\beta$ ,16 $\alpha$ ,17 $\alpha$ -trihydroxyprogesterone derived from 16 $\alpha$ ,17 $\alpha$ -dihydroxyprogesterone (600 MHz, CDCl<sub>3</sub>).

FIGURE S2. HMBC NMR spectrum of 6 $\beta$ ,16 $\alpha$ ,17 $\alpha$ -trihydroxyprogesterone derived from 16 $\alpha$ ,17 $\alpha$ -dihydroxyprogesterone (600 MHz, CDCl<sub>3</sub>).

FIGURE S3. COSY NMR spectrum of 6 $\beta$ ,16 $\alpha$ ,17 $\alpha$ -trihydroxyprogesterone derived from 16 $\alpha$ ,17 $\alpha$ -dihydroxyprogesterone (600 MHz, CDCl<sub>3</sub>).

FIGURE S4. HSQC NMR spectrum of 6 $\beta$ ,16 $\alpha$ ,17 $\alpha$ -trihydroxyprogesterone derived from 16 $\alpha$ ,17 $\alpha$ -dihydroxyprogesterone (600 MHz, CDCl<sub>3</sub>).

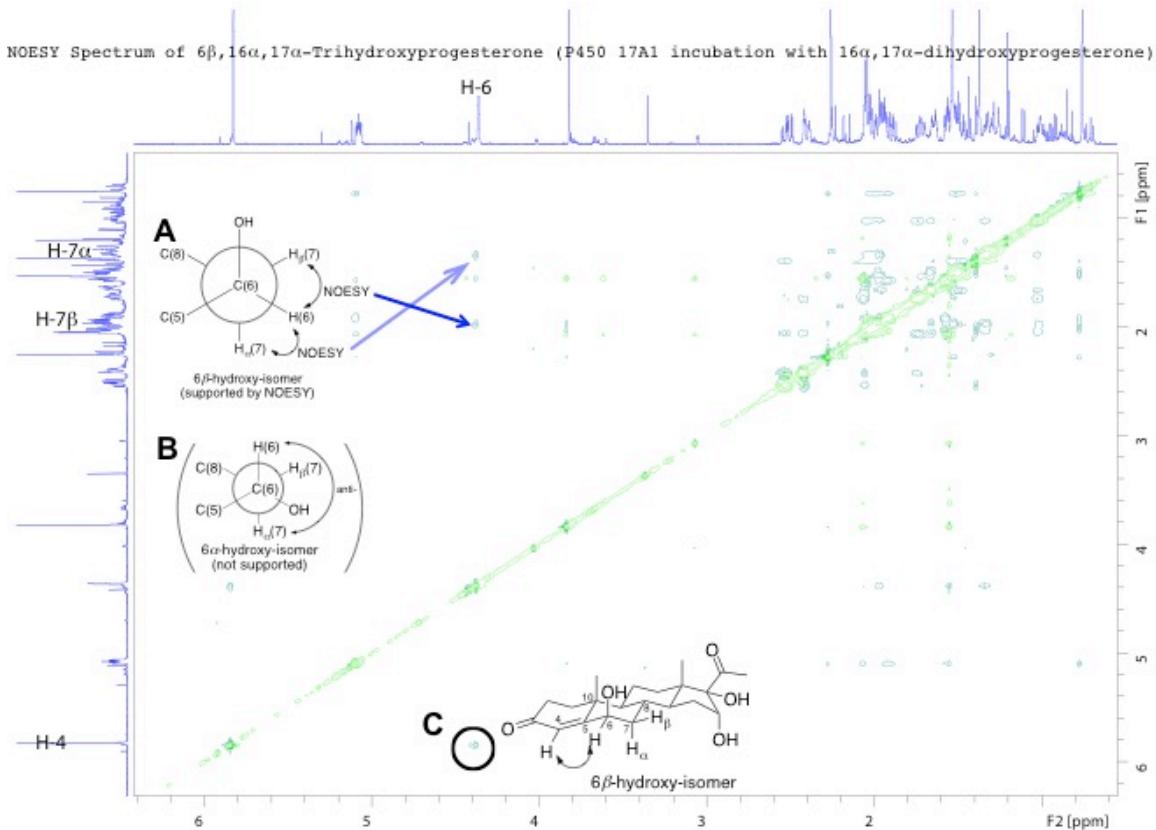

**FIGURE S1. NOESY NMR spectrum of 6 $\beta$ ,16 $\alpha$ ,17 $\alpha$ -trihydroxyprogesterone derived from 16 $\alpha$ ,17 $\alpha$ -dihydroxyprogesterone (600 MHz, CDCl<sub>3</sub>). (A) Newman projection along C6-C7 bond axis to show the proximity between H-6 $\alpha$  ( $\delta$  4.38 ppm) with H-7 $\alpha$  ( $\delta$  1.34 ppm) and H-7 $\beta$  ( $\delta$  1.98 ppm) protons that is supported by the NOESY data, and for comparison: (B) a Newman projection along the C6-C7 bond axis of a hypothetical 6 $\alpha$ -hydroxy epimer (6 $\alpha$ ,16 $\alpha$ ,17 $\alpha$ -trihydroxyprogesterone) to show anti-configuration of H-6 $\beta$  with H-7 $\alpha$ . (C) NOESY interaction between H-6 ( $\delta$  4.38 ppm) and H-4 ( $\delta$  5.84 ppm) protons.**

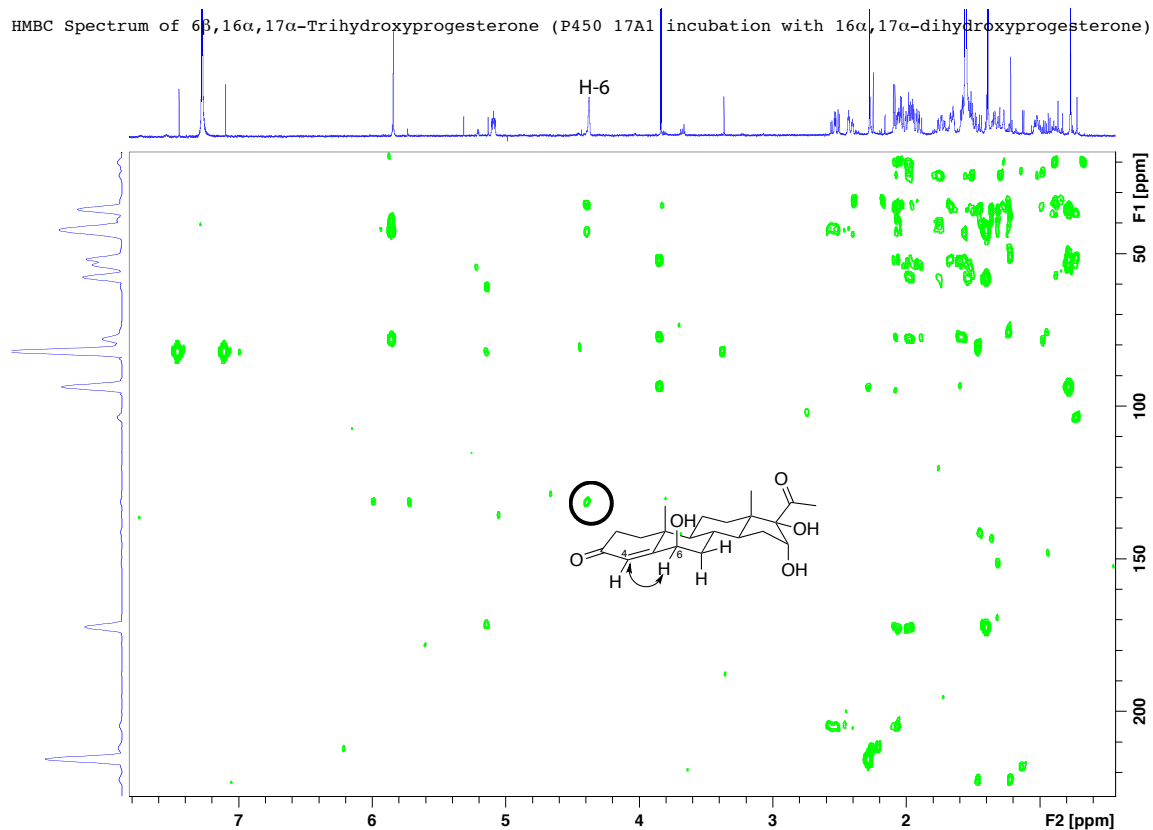

FIGURE S2. **HMBC NMR spectrum of  $6\beta,16\alpha,17\alpha$ -trihydroxyprogesterone derived from  $16\alpha,17\alpha$ -dihydroxyprogesterone (600 MHz,  $\text{CDCl}_3$ ).** The H-6 hydroxymethine proton ( $\delta$  4.38 ppm) is shown to have a 3-bond coupling to the C4-carbon ( $\delta$  128 ppm).

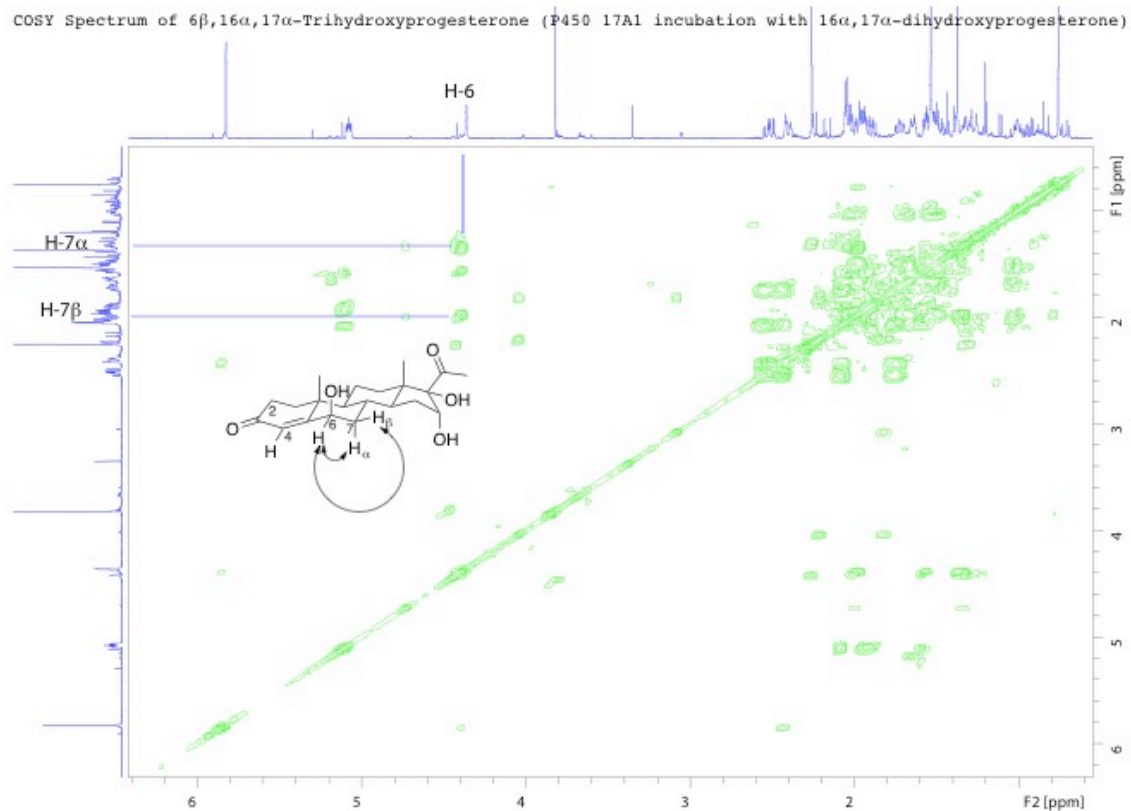

FIGURE S3. COSY NMR spectrum of  $6\beta,16\alpha,17\alpha$ -trihydroxyprogesterone derived from  $16\alpha,17\alpha$ -dihydroxyprogesterone (600 MHz,  $\text{CDCl}_3$ ). Shown with the lines are the 3-bond coupling interaction between the H-6 proton ( $\delta$  4.38 ppm) with the H-7 protons ( $\delta$  1.34 and 1.98 ppm).

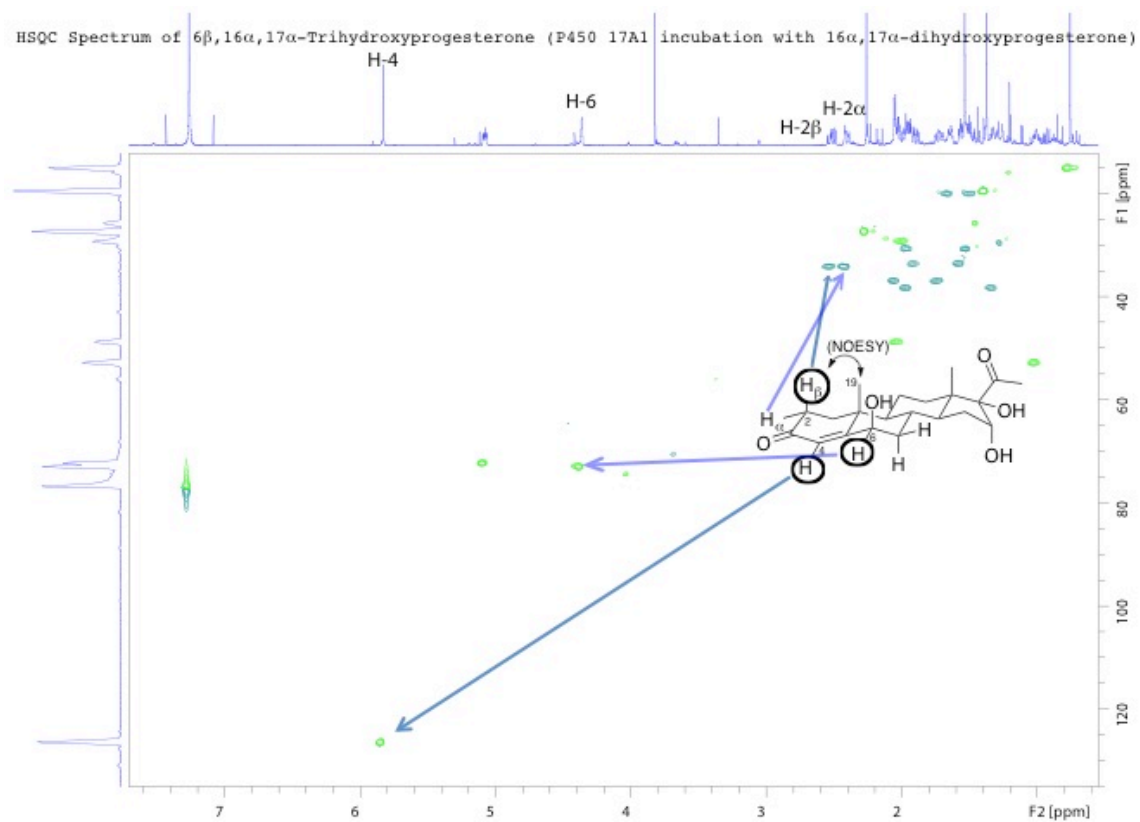

FIGURE S4. HSQC NMR spectrum of 6 $\beta$ ,16 $\alpha$ ,17 $\alpha$ -trihydroxyprogesterone derived from 16 $\alpha$ ,17 $\alpha$ -dihydroxyprogesterone (600 MHz, CDCl<sub>3</sub>). The arrows show the assignment of C2, C4, and C7 carbons ( $\delta$  34.2, 127.7, and 38.5 ppm) with their respective one-bond heteronuclear correlations to assign their attached protons.
